# Supplementary material for: SARS coronavirus entry into host cells through a novel clathrin- and caveolae-independent endocytic pathway
Source: Springer Nature journal article supplement (doi:10.1038/cr.2008.15), 2008-01-29
Supplement: 41422_2008_BFcr200815_MOESM255_ESM.pdf [file 41422_2008_BFcr200815_MOESM255_ESM.pdf]

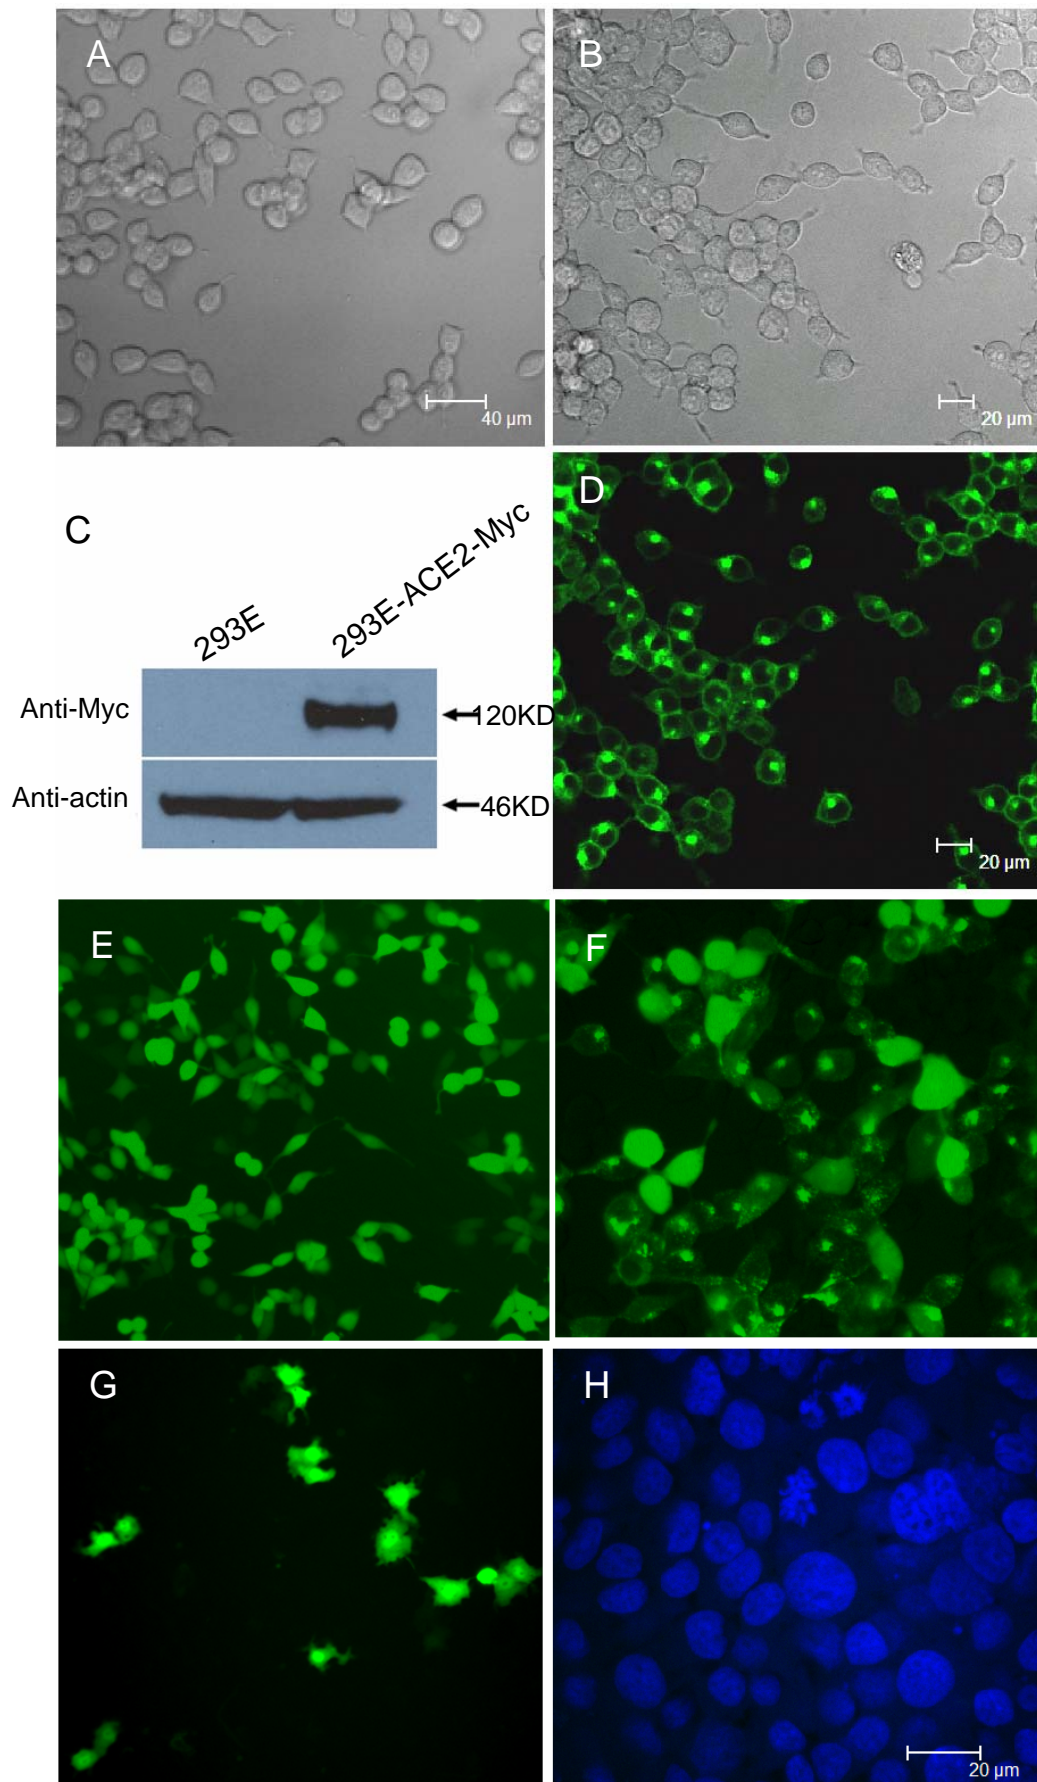

**Figure S1** Stably engineered ACE2 expressing HEK293 cell lines are susceptible to

SARS-CoV entry.

**(A)** The phase-contrast image of 293E-ACE2-Myc cell lines

**(B)** The phase-contrast image of 293E-ACE2-GFP cell lines

**(C)** Western blot confirmed the expression of ACE2 in the 293E-ACE2-Myc cell lines; 293E was used as a control.

**(D)** ACE2-GFP was detected on the cell surface of stably engineered HEK293 cells (HEK293E-ACE2-GFP).

**(E)** 293E-ACE2-Myc cell line can be infected by the spike-bearing pseudoviruses. After 48 h incubation at 37°C, viral GFP expressed.

**(F)** 293E-ACE2-GFP cell lines infected by the spike-bearing pseudoviruses. After 48 h incubation at 37 °C, viral GFP expressed. In uninfected cells, GFP (ACE2-GFP) expresses mainly at the cell surface, while GFP (Viral GFP) was evenly distributed in cytoplasm and nucleus in the infected cells.

**(G)** Vero E6 cells infected with spike-bearing pseudoviruses. After 48 h incubation at 37°C, viral GFP expressed.

**(I)** 293E cells can not be infected by the spike-bearing pseudoviruses after 48 h incubation at 37 °C. Nuclear position was shown by staining nuclear with Hoechst 33342 (Sigma).
