# Supplementary material for: SARS coronavirus entry into host cells through a novel clathrin- and caveolae-independent endocytic pathway
Source: Springer Nature journal article supplement (doi:10.1038/cr.2008.15), 2008-01-29
Supplement: 41422_2008_BFcr200815_MOESM256_ESM.pdf [file 41422_2008_BFcr200815_MOESM256_ESM.pdf]

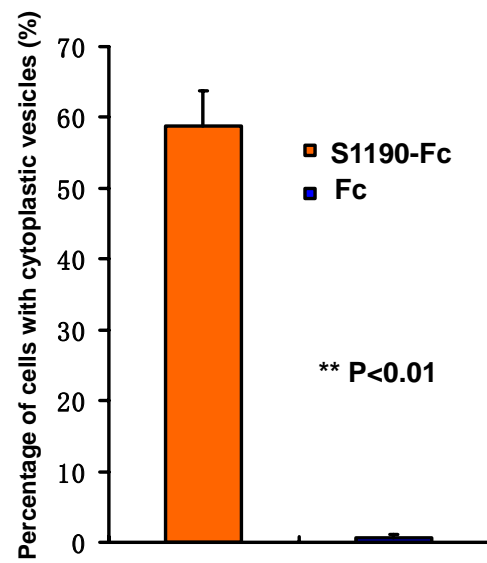

**Figure S2** Statistical analysis of S1190-Fc and Fc protein treated cells. Percentages of the cells that contained cytoplasmic vesicles are shown. A significant difference was observed between the S1190-Fc- and Fc-treated cells. Error bars represent SD of three independent experiments.
