# Supplementary material for: SARS coronavirus entry into host cells through a novel clathrin- and caveolae-independent endocytic pathway
Source: Springer Nature journal article supplement (doi:10.1038/cr.2008.15), 2008-01-29
Supplement: 41422_2008_BFcr200815_MOESM257_ESM.pdf [file 41422_2008_BFcr200815_MOESM257_ESM.pdf]

**A**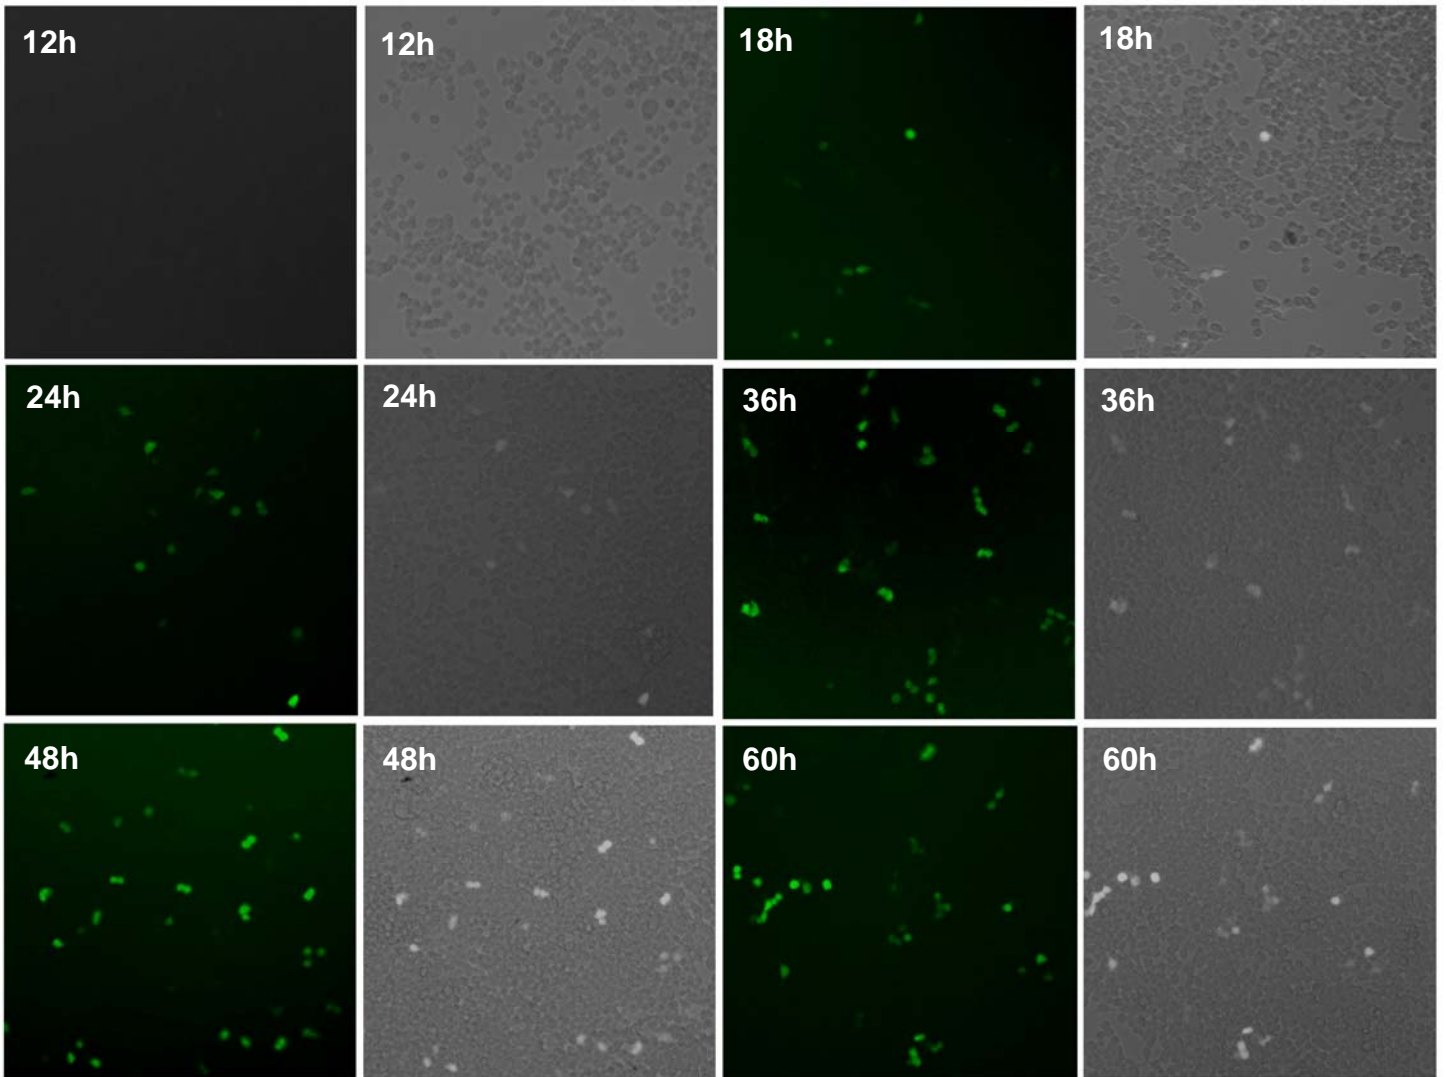**B**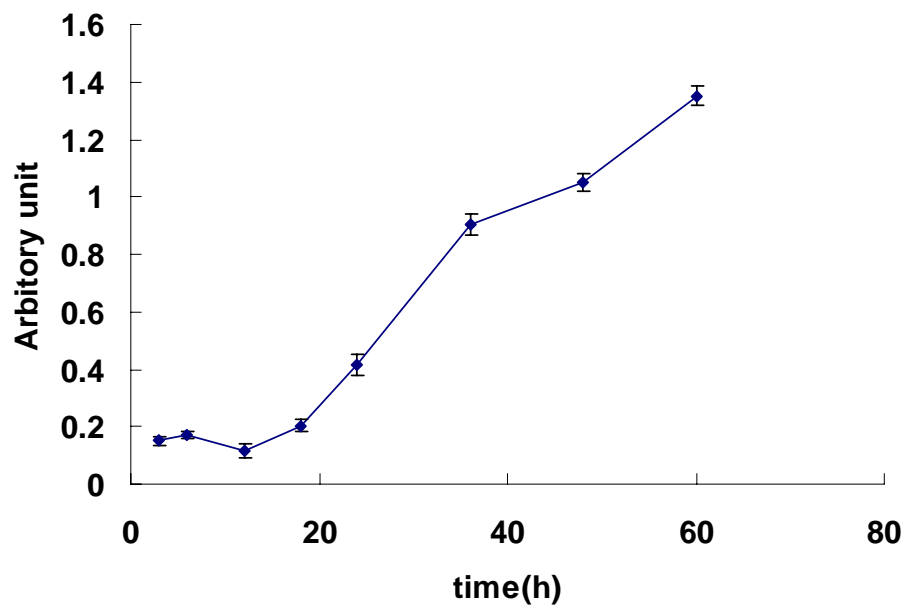

**Figure S3** The time-dependent expression of pseudovirus GFP. **(A)** Viral GFP expression profile at different time points. **(B)** Quantitative analysis of the viral GFP expression. Error bars represent SD of three independent experiments.
