# Supplementary material for: SARS coronavirus entry into host cells through a novel clathrin- and caveolae-independent endocytic pathway
Source: Springer Nature journal article supplement (doi:10.1038/cr.2008.15), 2008-01-29
Supplement: 41422_2008_BFcr200815_MOESM258_ESM.pdf [file 41422_2008_BFcr200815_MOESM258_ESM.pdf]

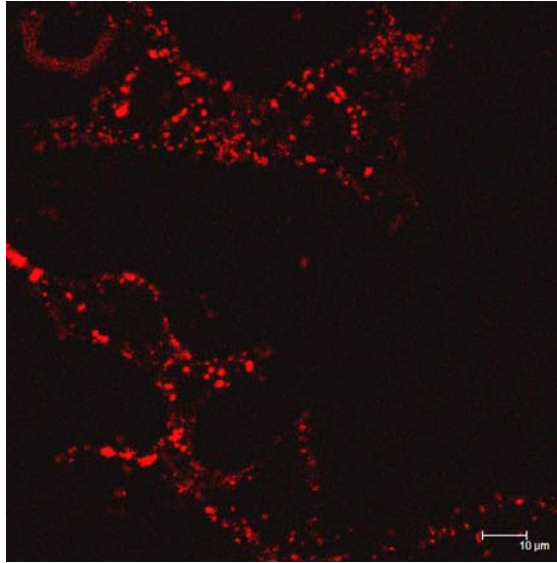

**Figure S4** Vero E6 cells incubated with Alexa 594 CTB for 1 h at 37 °C. CTB was found concentrated within the cell.
