# Supplementary material for: SARS coronavirus entry into host cells through a novel clathrin- and caveolae-independent endocytic pathway
Source: Springer Nature journal article supplement (doi:10.1038/cr.2008.15), 2008-01-29
Supplement: 41422_2008_BFcr200815_MOESM259_ESM.pdf [file 41422_2008_BFcr200815_MOESM259_ESM.pdf]

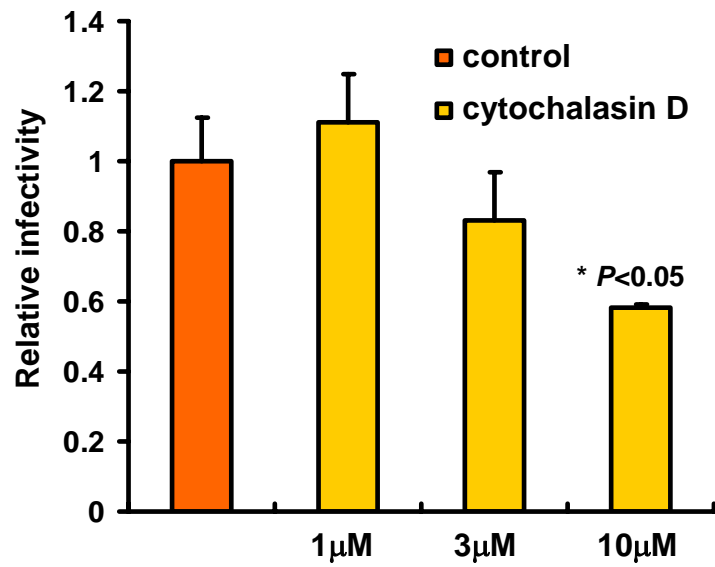

**Figure S5** Cytochalasin D can inhibit spike-bearing pseudovirus entry slightly. The indicated amounts of cytochalasin D were added to Vero E6 cells before they were infected with GFP-spike-bearing pseudoviruses. The infectivity of the viruses was measured using a spectrofluorometer after 60 h incubation at 37 °C. Asterisks indicate significant difference from controls ( $P < 0.05$ ,  $t$  test); Error bars represent SD of three independent experiments.
